# Supplementary material for: How Urban-Tolerant Are They? Testing Prey–Capture Behavior of Introduced Jorō Spiders (Trichonephila clavata) Next to Busy Roads
Source: MDPI journal article supplement (doi:10.3390/arthropoda2010004), 2024-02-13

## Supplemental file for Arthropoda-2834684

How Urban-tolerant Are They? Testing Prey-capture Behavior of Introduced Jorō Spiders (*Trichonephila clavata*) Next to Busy Roads

Figure S1. Graph of average jorō spider mass across the 20 different roads in this study. The roads are ordered by their traffic density (cars/day). There was significant variation in spider mass across roads (one-way ANOVA,  $F_{17,341}=5.13$ ,  $p<0.0001$ ), though there was no obvious trend with respect to traffic density.

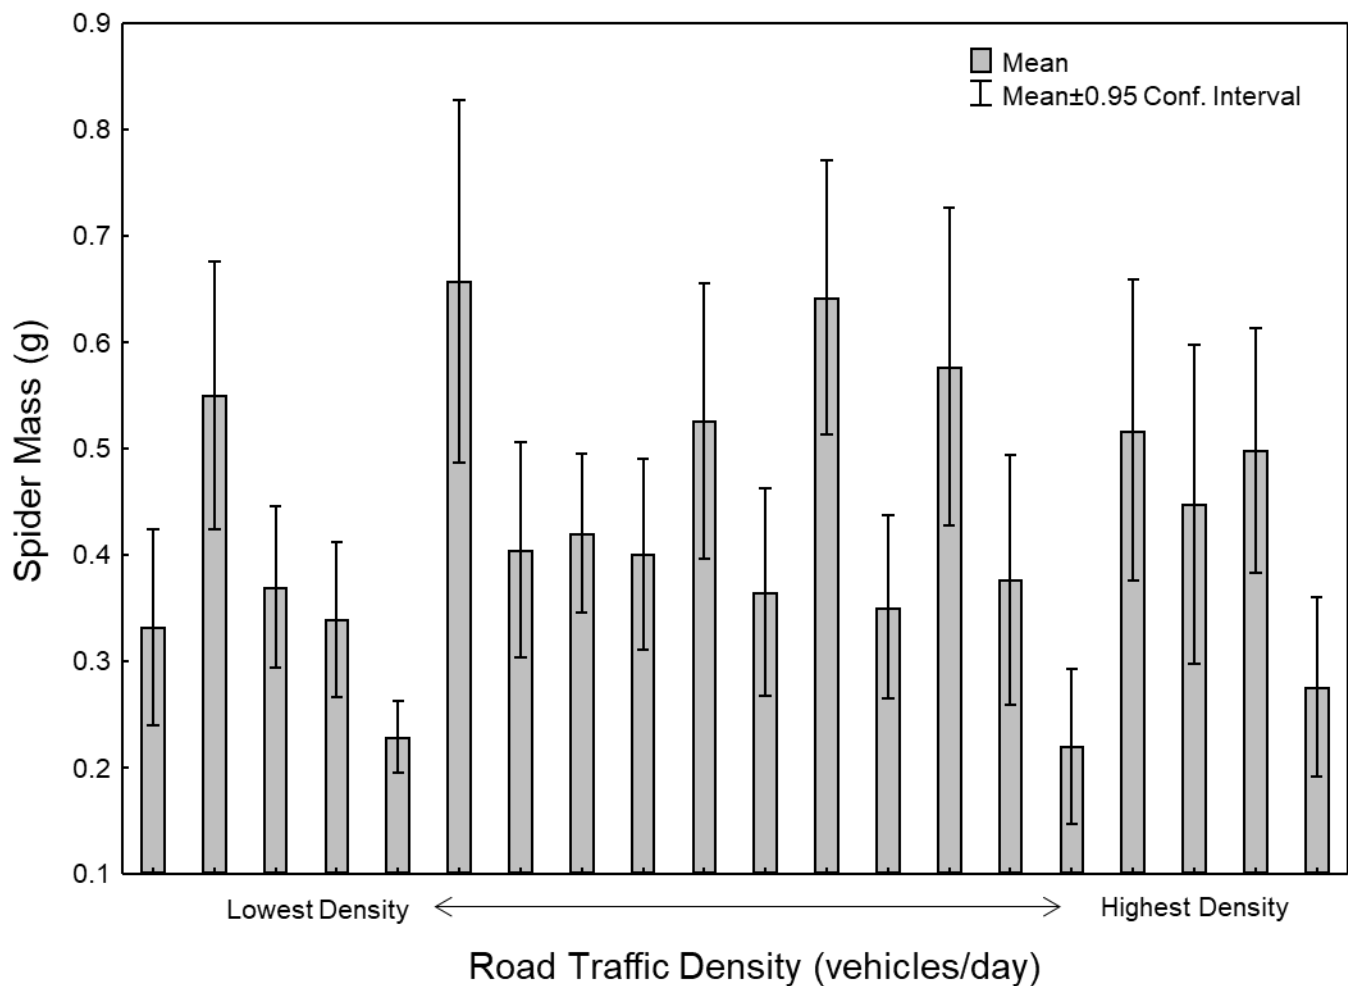

Supplement: s1 [file s1]
